# Supplementary material for: Cost of Blood and Body Fluid Occupational Exposure Management in Beijing, China
Source: PubMed Central journal article supplement (PMC7345934; doi:10.3390/ijerph17124192), 2020-06-12
Supplement: ijerph-17-04192-s001.pdf [file ijerph-17-04192-s001.pdf]

## Supplementary Materials

**Table S1.** List of BBF exposure management regulations involving “safety injection” in China.

| Year of enactment | Issuer                                         | Title                                                                                             |
|-------------------|------------------------------------------------|---------------------------------------------------------------------------------------------------|
| 2004              | National Health and Family Planning Commission | Guiding Principles for the Work of HIV Professional Occupational Exposure Protection (Trial) [11] |
| 2009              | Ministry of Health                             | Guidelines for the Prevention of Occupational Exposure to Blood-borne Pathogens [12]              |
| 2015              | National Health and Family Planning Commission | Occupational Exposure to HIV Treatment Procedures [13]                                            |
| 2015              | Chinese Medical Association                    | Guidelines for the Prevention and Treatment of Chronic Hepatitis B (2015 Update) [14]             |
| 2015              | Chinese Medical Association                    | Guide to Prevention and Treatment of Hepatitis C [15]                                             |

**Table S2.** Descriptions of direct cost items included from the survey.

| Process          | HBV                       | HCV                   | TP                       | HIV                           | Unknown               |
|------------------|---------------------------|-----------------------|--------------------------|-------------------------------|-----------------------|
| Laboratory tests | HBSAg                     | CBC                   | RPR                      | HIV p24 antigen               | HBV tests             |
|                  | HBSAb                     | HCVAb                 | TPPA                     | test                          | HCV tests             |
|                  | HBeAg                     | HCV-RNA               |                          | HIV antibody test             | TP tests              |
|                  | HBeAb                     |                       | HBV, HCV, TP             | HIV tests                     |                       |
|                  | HbAb                      |                       |                          | related tests                 |                       |
| Medical supplies | Blood collection tube     | Blood collection tube | Blood collection tube    | Blood collection tube         | Blood collection tube |
|                  | Injection set             |                       | Injection set            | Injection set                 |                       |
| PEP              | Hepatitis B vaccine, HbIg |                       | Penicillin, Erythromycin | Truvada, RAL, AZT, 3TC, HIVIG |                       |

**Note:** HIV, human immunodeficiency virus; HBV, hepatitis B virus; HCV, hepatitis C virus; TP, *Treponema pallidum*; PEP, post-exposure prophylaxis; HbIg, hepatitis B hyper-immune globulin; HIVIG, anti-HIV immune globulin; RAL, raltegravir; AZT, azidothymidine; 3TC, lamivudine.
